# Supplementary material for: System-wide identification of wild-type SUMO-2 conjugation sites
Source: PubMed Central journal article supplement — Nat Commun. 2015 Jun 15;6:7289. doi: 10.1038/ncomms8289 (PMC4490555; doi:10.1038/ncomms8289), 2015-06-15
Supplement: ncomms8289-s1.pdf [file ncomms8289-s1.pdf]

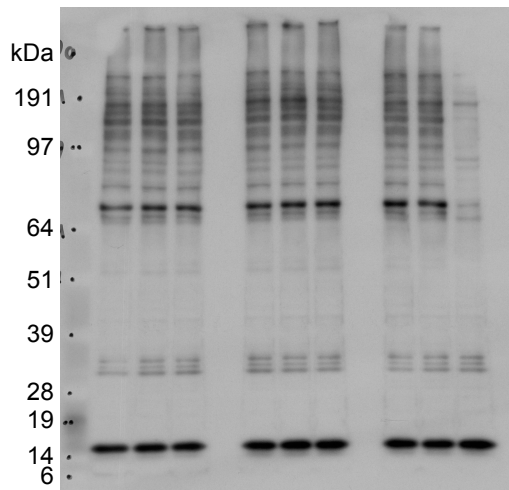

Corresponding to Fig. 1A  
(left panel)

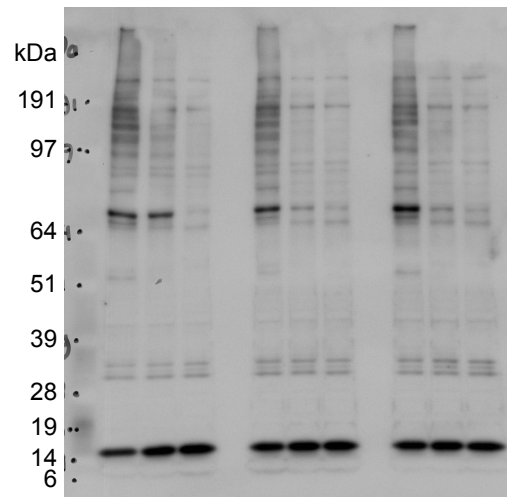

Corresponding to Fig. 1A  
(right panel)

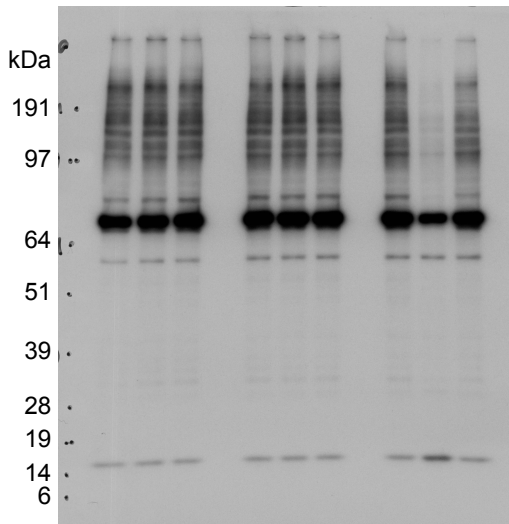

Corresponding to Fig. 1C  
(left panel)

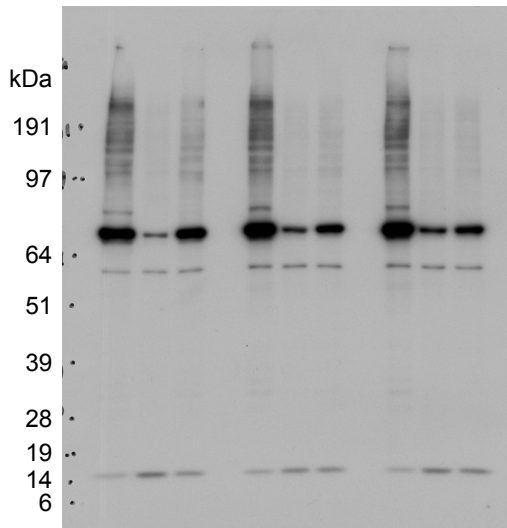

Corresponding to Fig. 1C  
(right panel)

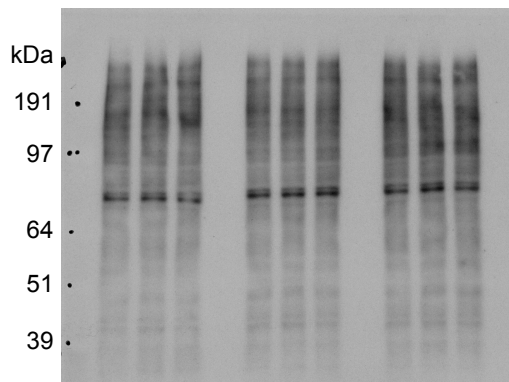

Corresponding to Fig. 1E  
(left panel)

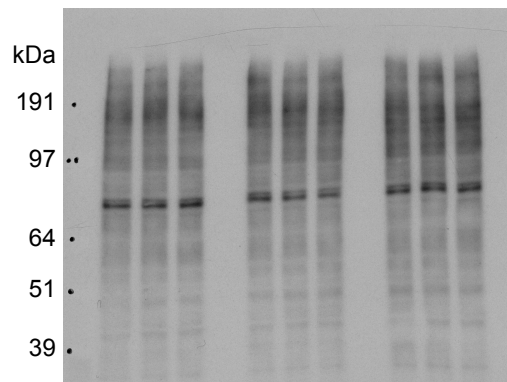

Corresponding to Fig. 1E  
(right panel)

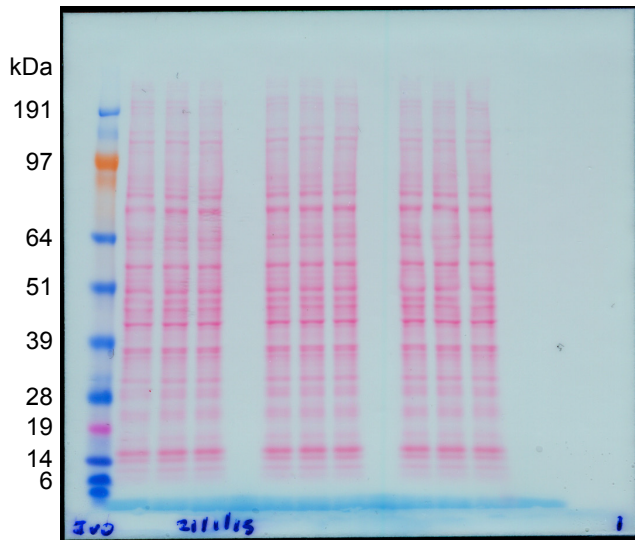

Corresponding to Fig. 1G  
(left panel)

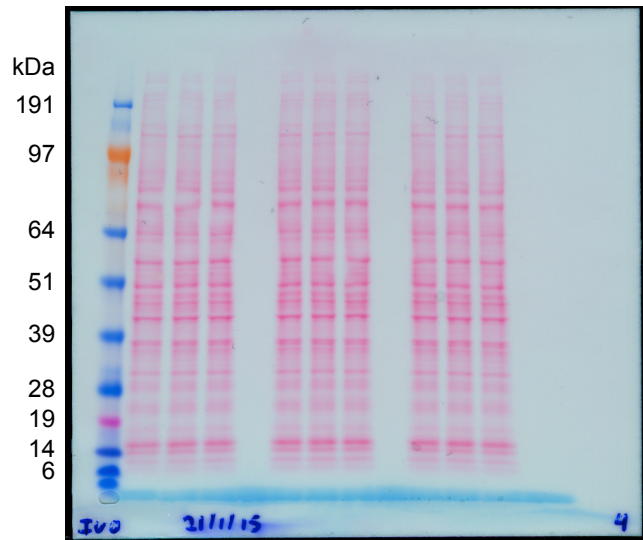

Corresponding to Fig. 1G  
(right panel)

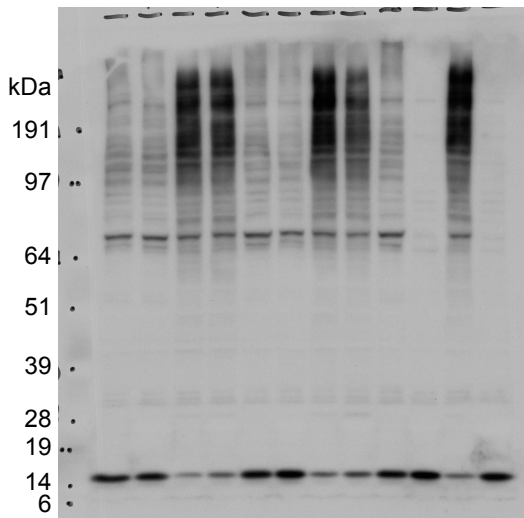

Corresponding to Fig. 2A  
(left panel)

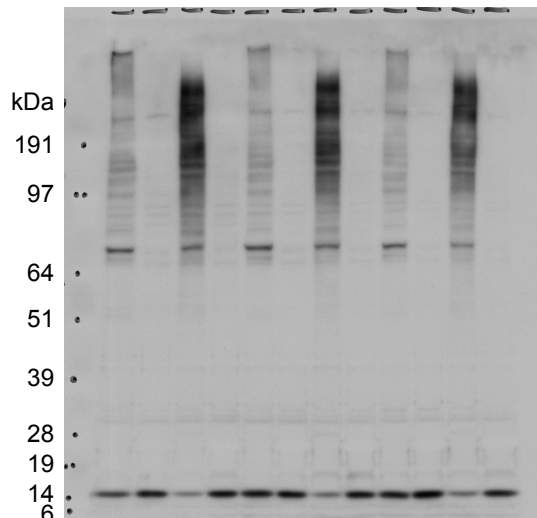

Corresponding to Fig. 2B  
(right panel)

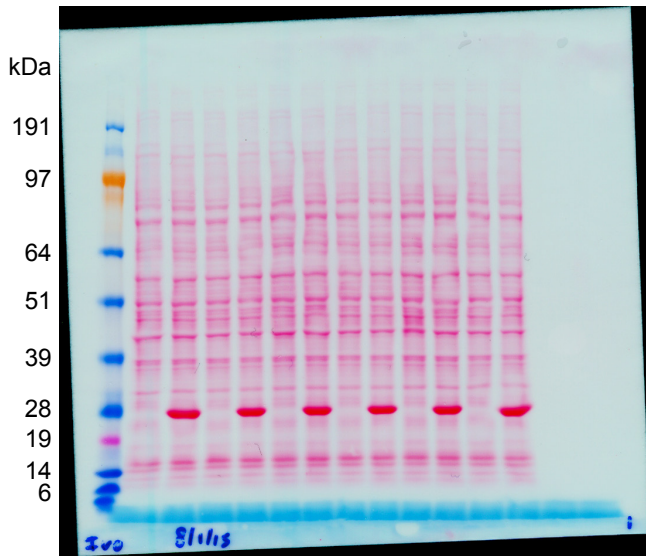

Corresponding to Fig. 2B  
(left panel)

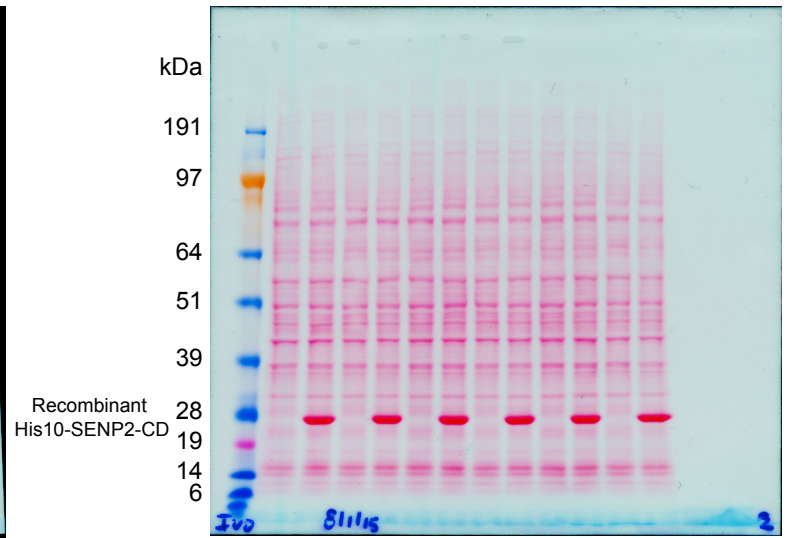

Corresponding to Fig. 2B  
(right panel)

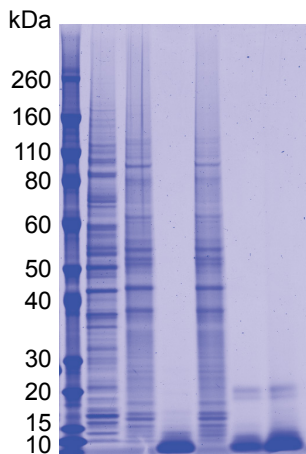

Corresponding to Fig. 3A

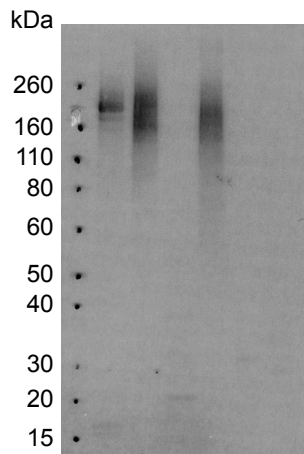

Corresponding to Fig. 3B

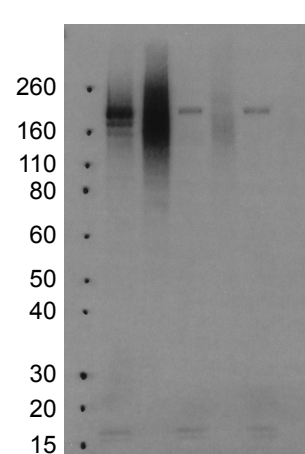

Corresponding to Fig. 3C

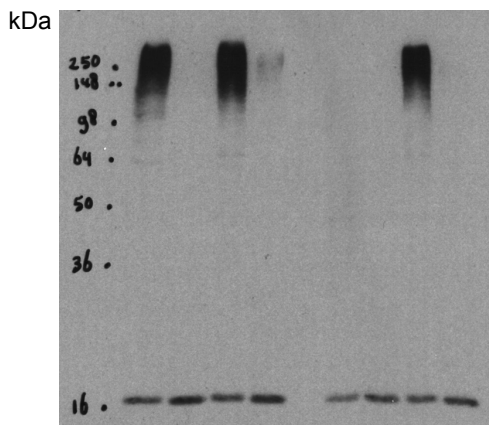

Corresponding to Fig. 3D

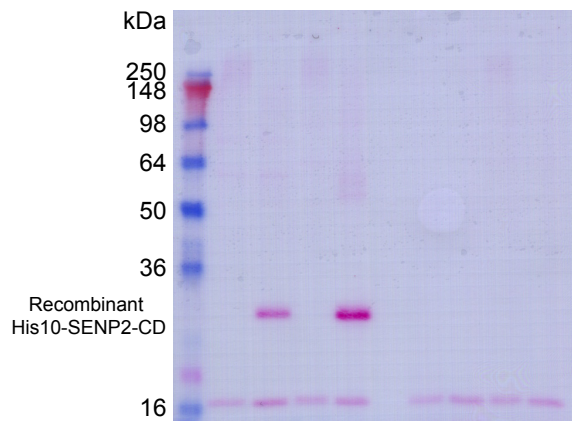

Corresponding to Fig. 3E



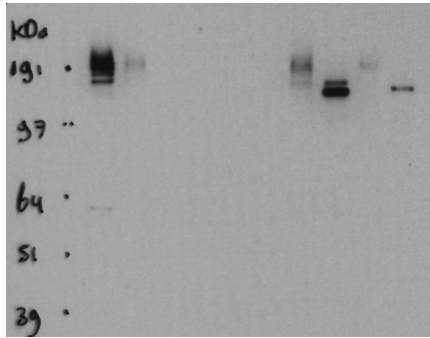

Corresponding to Fig. 4B and 4D

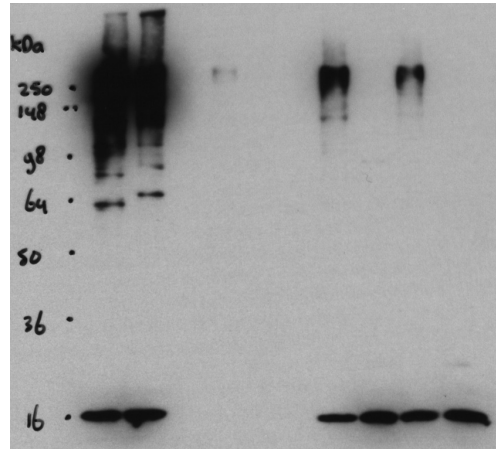

Corresponding to Fig. 4C and 4E

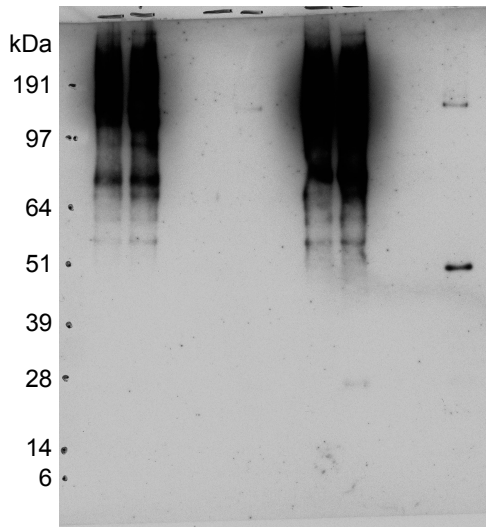

Corresponding to Fig. 4F (top panel)

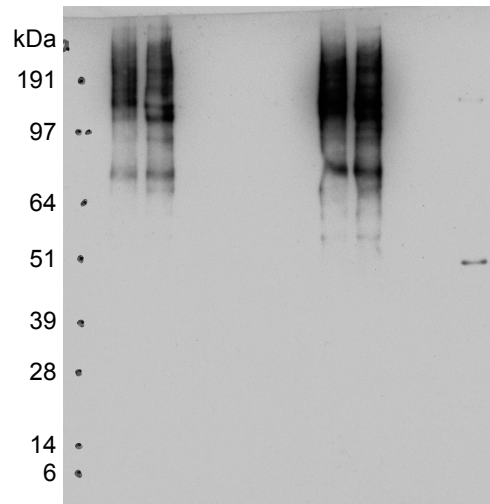

Corresponding to Fig. 4F (bottom panel)

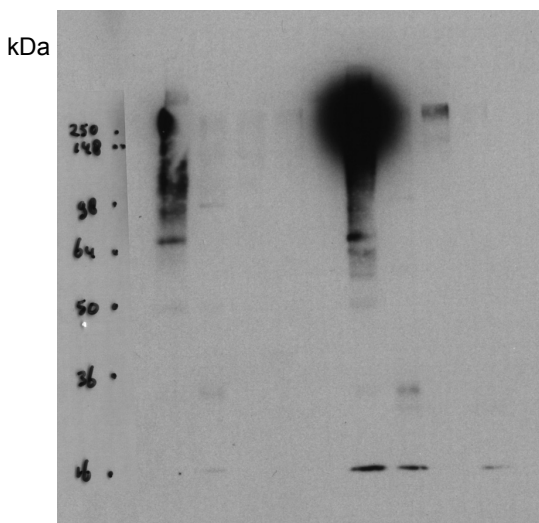

Corresponding to Fig. 5A (left panel)

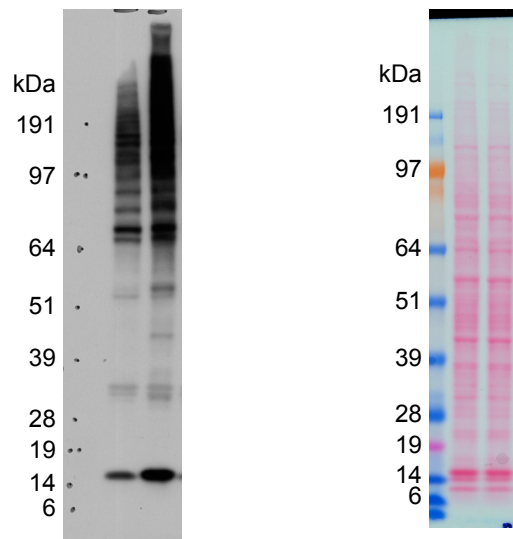

Corresponding to Fig. 5A (right panel)

# Supplementary Figure 1 (4/8)

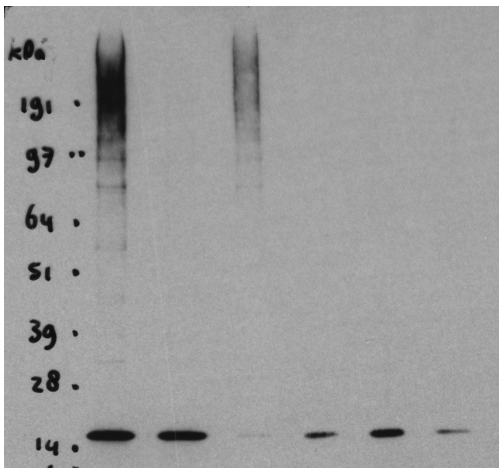

Corresponding to Fig. 6B

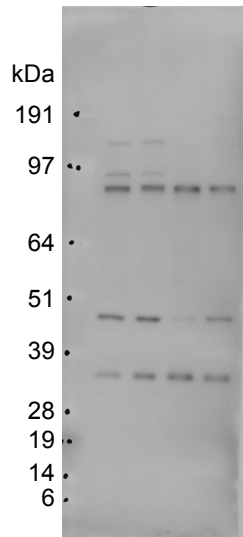

Corresponding to Fig. 9A  
(1st row, 1st column)

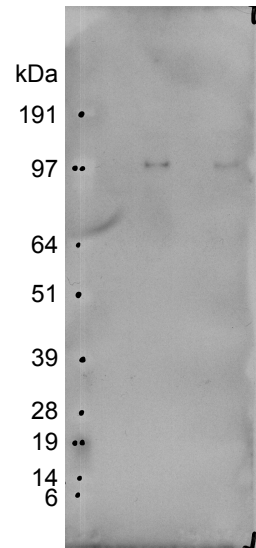

Corresponding to Fig. 9A  
(1st row, 2nd column)

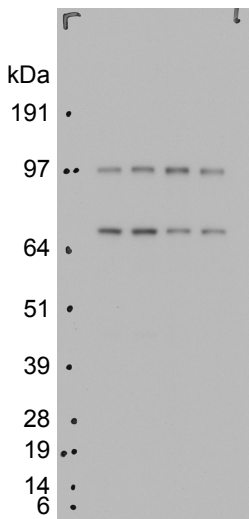

Corresponding to Fig. 9A  
(2nd row, 1st column)

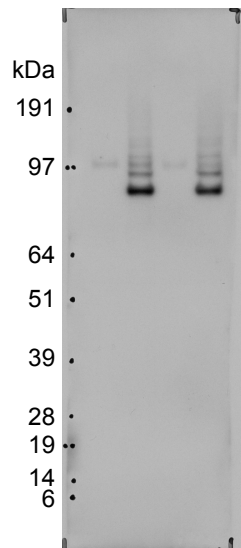

Corresponding to Fig. 9A  
(2nd row, 2nd column)

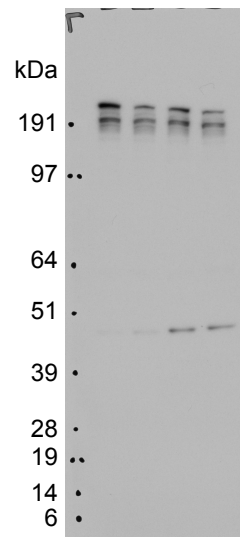

Corresponding to Fig. 9A  
(3rd row, 1st column)

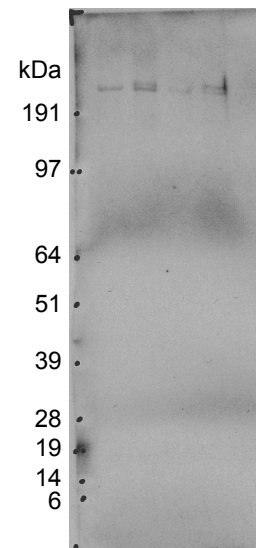

Corresponding to Fig. 9A  
(3rd row, 2nd column)

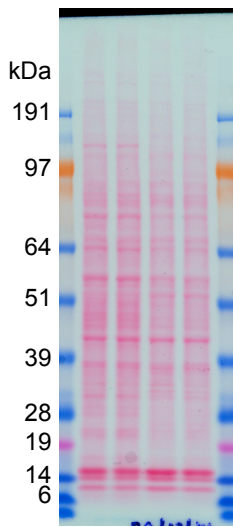

Corresponding to Fig. 9B  
(left panel)

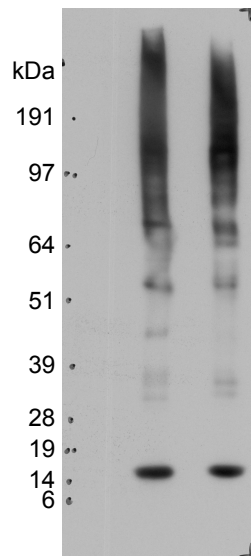

Corresponding to Fig. 9B  
(right panel)

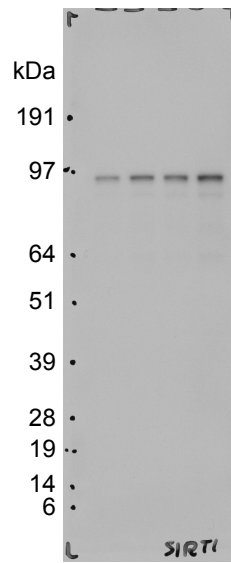

Corresponding to Fig. 9C  
(1st row, 1st column)

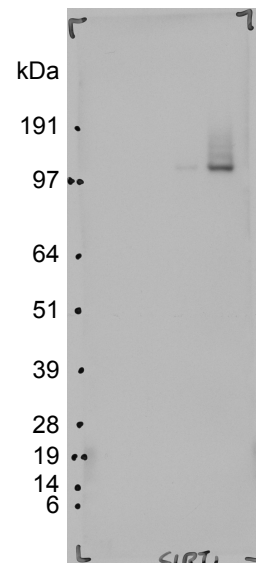

Corresponding to Fig. 9C  
(1st row, 2nd column)

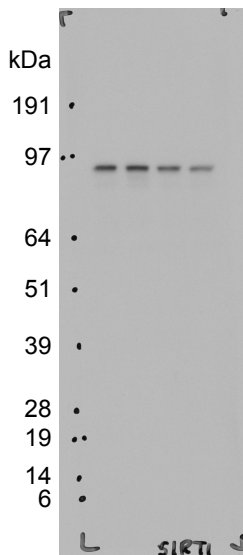

Corresponding to Fig. 9C  
(1st row, 3rd column)

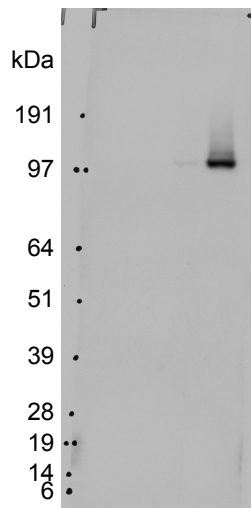

Corresponding to Fig. 9C  
(1st row, 4th column)

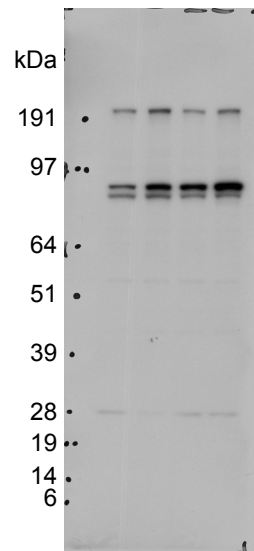

Corresponding to Fig. 9C  
(2nd row, 1st column)

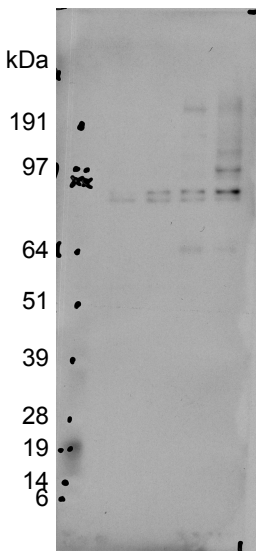

Corresponding to Fig. 9C  
(2nd row, 2nd column)

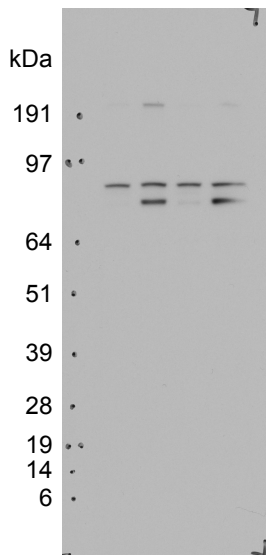

Corresponding to Fig. 9C  
(2nd row, 3rd column)

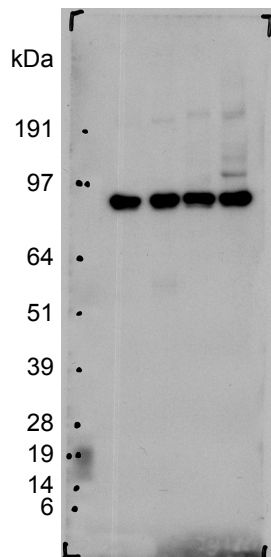

Corresponding to Fig. 9C  
(2nd row, 4th column)

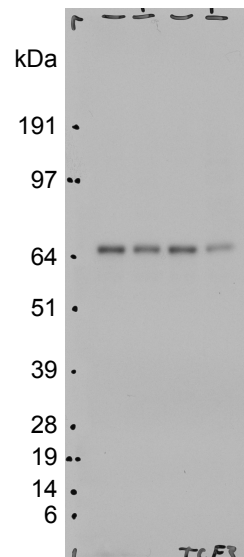

Corresponding to Fig. 9C  
(3rd row, 1st column)

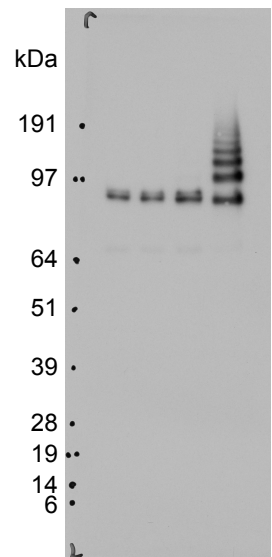

Corresponding to Fig. 9C  
(3rd row, 2nd column)

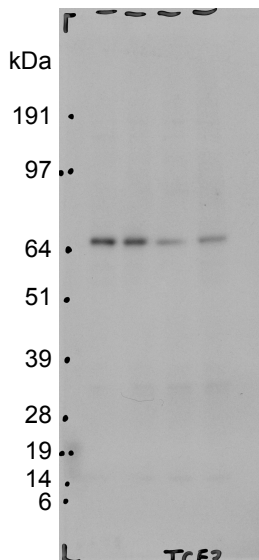

Corresponding to Fig. 9C  
(3rd row, 3rd column)

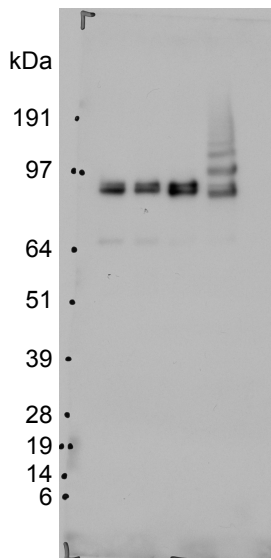

Corresponding to Fig. 9C  
(3rd row, 4th column)

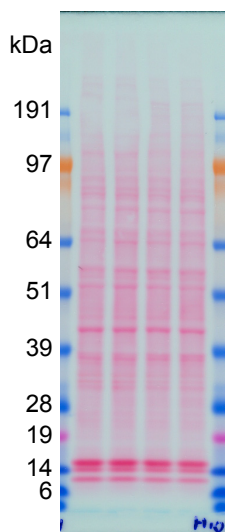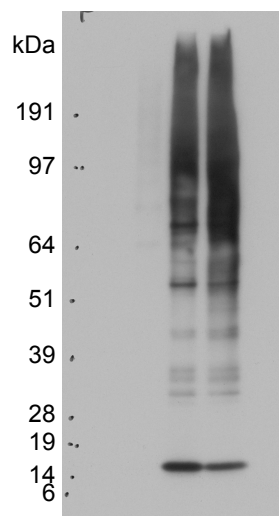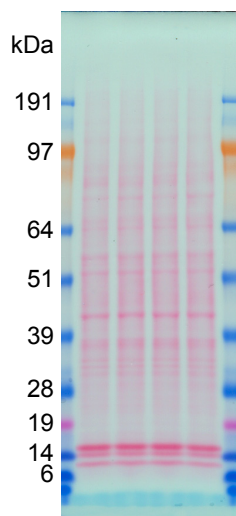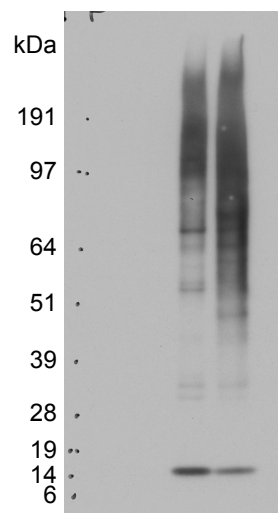

Corresponding to Fig. 9D  
(1st column)

Corresponding to Fig. 9D  
(2nd column)

Corresponding to Fig. 9D  
(3rd column)

Corresponding to Fig. 9D  
(4th column)
